# Supplementary material for: Intracellular Behaviour of Legionella Non-pneumophila Strains within Three Amoeba Strains, Including Willaertia magna C2c Maky
Source: MDPI journal article supplement (doi:10.3390/pathogens10101350), 2021-10-19
Supplement: s1 [file s1]

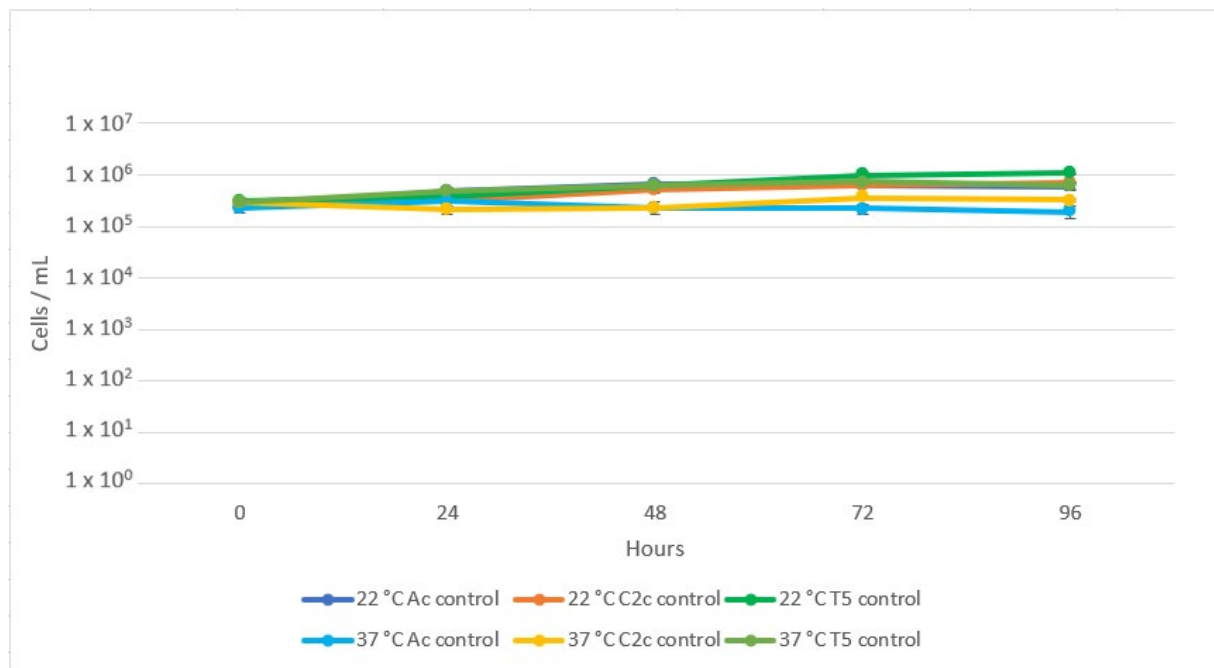

**Figure S1.** Amoeba survival in SCYEM medium at 22 °C and 37°C. Ac: *A. castellanii*; C2c: *W. magna* C2c Maky; T5S44: *W. magna* T5(S)44. Results are expressed as the mean  $\pm$  SD.

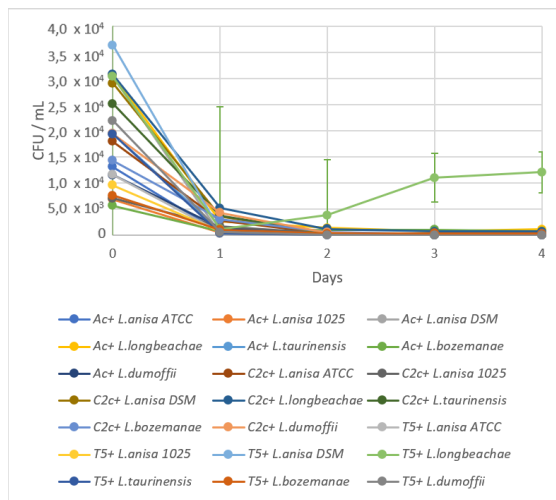

(a)

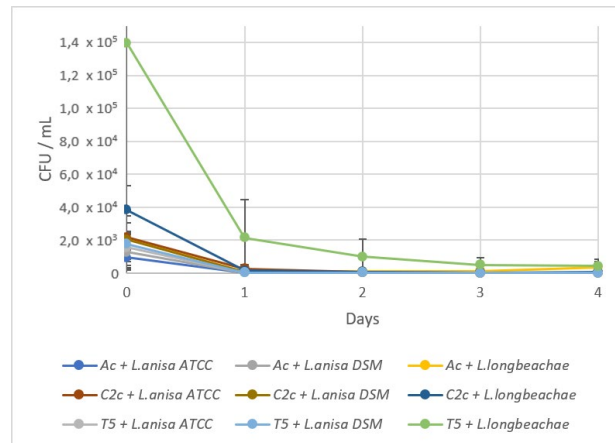

(b)

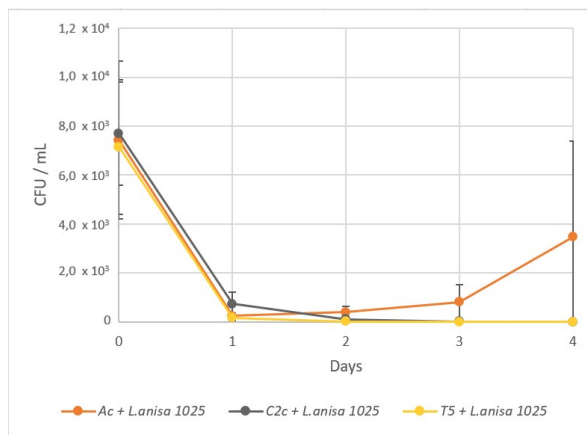

(c)

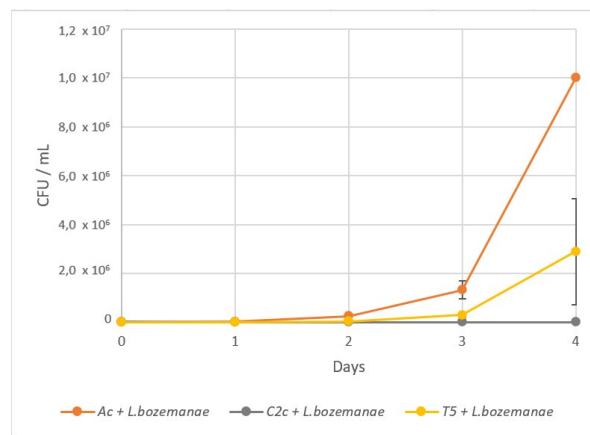

(d)

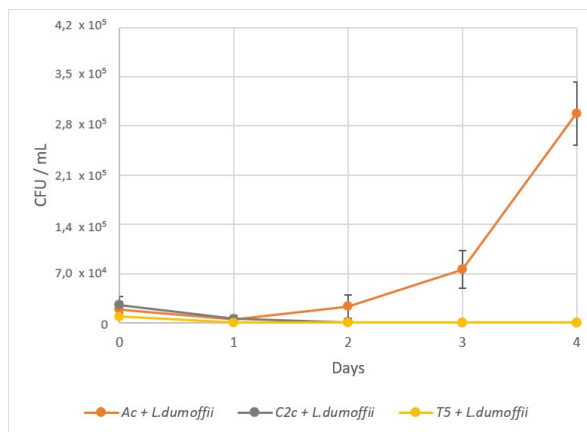

(e)

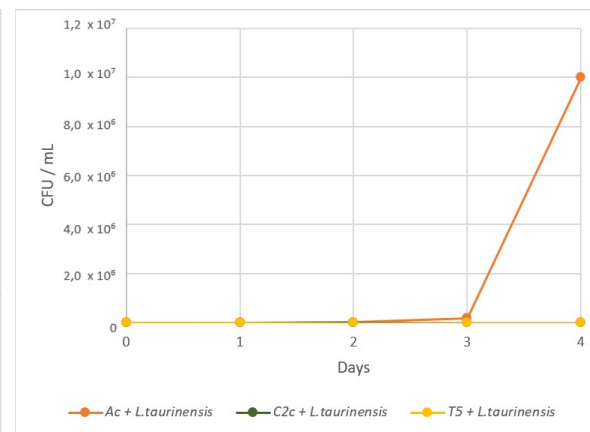

(f)

**Figure S2.** Intracellular bacterial fate of bacteria. **a:** all bacteria at 22°C; **b:** *L. anisa* ATCC, DSM and *L. longbeachae* at 37°C **c:** *L. anisa* 1025 at 37°C, **b:** *L. bozemanae* at 37°C, **d:** *L. dumoffii* at 37°C and **e:** *L. taurinensis* at 37°C. Ac: *A. castellanii* (a-f); C2c: *W. magna* C2c Maky (a-f); T5S44: *W. magna* T5(S)44 (a-f). Results are expressed as the mean  $\pm$  SD.
